# Supplementary material for: Selective Isolation of Eggerthella lenta from Human Faeces and Characterisation of the Species Prophage Diversity
Source: Microorganisms. 2022 Jan 17;10(1):195. doi: 10.3390/microorganisms10010195 (PMC8778435; doi:10.3390/microorganisms10010195)
Supplement: Supplementary file 1 [file microorganisms-10-00195-s001.zip › Supplementary Information S1.xlsx]

## Sheet: Table S1
Table S1: Details of E. lenta strains utilised in this study for experimental and genomic analysis
No.	Strain	completion status	genome source*	BioSample	Isolation source	Submitting Institute	NCBI submission date	Scaffolds	Size(Mb)	total CDS no***	GC%	N50	Fold coverage	Completeness***	Contamination***
1	MRI-F36	draft	Isolate	SAMN13387018	fecal sample, 2012, Germany: Karlsruhe	Max Rubner-Institut, Germany	2019-11-26	52	3.29959	2797	64.2			100	0
2	MRI-F37	draft	Isolate	SAMN13387019	fecal sample, 2012, Germany: Karlsruhe	Max Rubner-Institut, Germany	2019-11-26	54	3.29628	2795	64.2			100	0
3	MRI-F40	draft	Isolate	SAMN13387020	fecal sample. 2012, Germany: Karlsruhe	Max Rubner-Institut, Germany	2019-11-26	51	3.30004	2802	64.2			100	0
4	ResAG-121	draft	Isolate	SAMN13387016	fecal sample, 2016, Germany: Karlsruhe	Max Rubner-Institut, Germany	2019-11-26	147	3.48522	2964	64			100	0
5	ResAG-145	draft	Isolate	SAMN13387017	fecal sample, 2016, Germany: Karlsruhe	Max Rubner-Institut, Germany	2019-11-26	154	3.50111	2973	64			100	0
6	ResAG-49	draft	Isolate	SAMN13387014	fecal sample, 2016-07-25, Germany: Karlsruhe	Max Rubner-Institut, Germany	2019-11-26	75	3.40153	2893	64			100	1.61
7	ResAG-88	draft	Isolate	SAMN13387015	fecal sample, 2016-07-21, Germany: Karlsruhe	Max Rubner-Institut, Germany	2019-11-26	81	3.47251	2932	64			100	0.27
8	MGYG-HGUT-02544	draft	Isolate	SAMEA5852049	human gut	The Unified Human Gastrointestinal Genome catalogue	2019-08-16	63	3.73815	3186	64.3			100	0
9	SV_Bg7063_mod2	draft	Isolate	SAMEA5771504	N/A	The Edison Family Center of Genome Sciences and Systems Biology. USA	2019-07-15	31	3.18977	2948	64.1			100	0.81
10	TF05-26B-4	draft	Isolate	SAMN09736880	feces, 2013, China: Shenzhen	BGI-CNGB, China	2018-07-30	83	3.37608	2896	64			100	0
11	11C	draft	Isolate	SAMN08365960	stool, 2013, USA: Cambridge, Massachusetts	UCSF, USA	2018-01-15	63	3.54185	2967	64.2			100	0
12	14A	draft	Isolate	SAMN08365961	stool, 2013, USA: Cambridge, Massachusetts	UCSF, USA	2018-01-15	63	3.74	3152	64.3			100	0
13	19A	draft	Isolate	SAMN08365964	stool, 2013, USA: Cambridge, Massachusetts	UCSF, USA	2018-01-16	49	3.36	2777	63.9			100	1.61
14	28B	draft	Isolate	SAMN08365965	stool, 2013, USA: Cambridge, Massachusetts	UCSF, USA	2018-01-17	63	3.45847	2930	64			100	0.81
15	32-6-I 6 NA	draft	Isolate	SAMN08365966	stool, 2013, Canada: Guelph, Ontario	UCSF, USA	2018-01-15	69	3.54901	3029	64			100	0
16	A2	draft	Isolate	SAMN08365967	fecal, 2016, USA: Cambridge, Massachusetts	UCSF, USA	2018-01-15	33	3.48321	2910	64			100	0
17	AB12 #2	draft	Isolate	SAMN08365968	stool, 2014, Canada: Guelph, Ontario	UCSF, USA	2018-01-15	60	3.71644	3154	64			100	0.81
18	AB8 #2	draft	Isolate	SAMN08365969	stool, 2014, Canada: Guelph, Ontario	UCSF, USA	2018-01-15	56	3.34373	2850	64.1			100	0.81
19	AN51LG	draft	Isolate	SAMN08365970	stool, 2015, Canada: Guelph, Ontario	UCSF, USA	2018-01-15	61	3.42458	2997	64.2			100	1.61
20	CC7/5 D5 2	draft	Isolate	SAMN08365972	Colon Biopsy (Ascending), 2015, Canada: Vancouver, British Columbia	UCSF, USA	2018-01-15	56	3.39644	2846	63.8			100	0
21	CC8/2 BHI2	draft	Isolate	SAMN08365973	Colon Biopsy (Sigmoid Colon), 2015, Canada: Vancouver, British Columbia	UCSF, USA	2018-01-15	57	3.51779	2973	64.3			100	0.81
22	CC8/6 D5 4	draft	Isolate	SAMN08365974	Colon Biopsy (Sigmoid Colon), 2015, Canada: Vancouver, British Columbia	UCSF, USA	2018-01-15	57	3.32395	2817	64			100	0
23	DSM 11767	draft	Isolate	SAMN08365975	feces, 1997, United Kingdom: Reading, Berkshire	UCSF, USA	2018-01-15	82	3.67381	2997	64.1			100	0.81
24	DSM 11863	draft	Isolate	SAMN08365976	feces, United Kingdom: Reading, Berkshire	UCSF, USA	2018-01-15	103	3.65475	3107	64.1			100	0.81
25	DSM 15644	draft	Isolate	SAMN08365977	Abdominal wound, 1990, USA: Milwuakee, Wisconsin	UCSF, USA	2018-01-15	81	3.58957	3103	64.2			99.73	0
26	MR1 #12	draft	Isolate	SAMN08365981	stool, , USA: Los Angeles, California 2014	UCSF, USA	2018-01-15	51	3.52651	2997	64.1			100	1.61
27	RC4/6F	draft	Isolate	SAMN08365982	Colon tumor tissue, 2015, Canada: Vancouver, British Columbia	UCSF, USA	2018-01-15	56	3.45057	2910	64.2			100	0
28	SECO-MT75m2	draft	Isolate	SAMN12004410	human, 2015, Germany	UCSF, USA	2018-01-15	125	3.48237	2961	63.8			100	0.81
29	Valencia	draft	Isolate	SAMN08365983	Blood culture, 2015, Spain: Valencia	UCSF, USA	2018-01-15	85	3.5371	3014	64.1			100	0.81
30	W1 BHI 6	draft	Isolate	SAMN08365984	stool, 2015, Canada: Guelph, Ontario	UCSF, USA	2018-01-15	59	3.29182	2772	63.9			100	0.81
31	C592	complete	Isolate	SAMN06853954	Homo sapiens, 2016, USA	University of Illinois, USA	2017-04-30	1	3.5932	3021	64.3
32	1_1_60AFAA	draft	Isolate	SAMN00103544	Colon Biopsy (Terminal Ileum), Canada: Calgary, Alberta	DOE Joint Genome Institute	2011-08-22	42	3.74829	2896	63.9			98.59	0.81
33	DSM 2243	complete	Isolate	SAMN00002594	Rectal Tumor, 1938	US DOE Joint Genome Institute	2009-09-09	1	3.63	3110	64.2
34	BSD2780120875_150330_C12	draft	Isolate	SAMN15533227	stool	Icahn School of Medicine at Mount Sinai	2020-06-17	13	3.57125	3079	64.1			100	0.81
35	1001302B_160321_A1	draft	Isolate	SAMN15532805	stool	Icahn School of Medicine at Mount Sinai	2020-06-17	34	3.61273	3093	64			100	1.61
36	1001095IJ_161003_H5	draft	Isolate	SAMN15533071	stool	Icahn School of Medicine at Mount Sinai	2020-06-17	19	3.39268	2885	64.2			100	0
37	1001287H_170206_A6	draft	Isolate	SAMN15532420	stool	Icahn School of Medicine at Mount Sinai	2020-06-17	26	3.42309	2883	64			100	1.61
38	BSD2780120874_150323_H10	draft	Isolate	SAMN15532598	stool	Icahn School of Medicine at Mount Sinai	2020-06-17	37	3.30265	2783	64			100	0
39	D33t1_170424_B8	draft	Isolate	SAMN15533037	stool	Icahn School of Medicine at Mount Sinai	2020-06-17	39	3.48556	2952	64.1			100	0
40	1001136B_160425_H2	draft	Isolate	SAMN15532527	stool	Icahn School of Medicine at Mount Sinai	2020-06-17	38	3.27068	2770	64.1			100	0.81
41	1001311H_170123_F12	draft	Isolate	SAMN15532967	stool	Icahn School of Medicine at Mount Sinai	2020-06-17	40	3.38546	2868	64.1			100	0
42	J1101437_171009_A1	draft	Isolate	SAMN15533284	stool	Icahn School of Medicine at Mount Sinai	2020-06-17	56	3.45906	2894	64.1			100	2.42
43	1001095H_141210_C9	draft	Isolate	SAMN15533319	stool	Icahn School of Medicine at Mount Sinai	2020-06-17	49	3.16629	2659	64			100	0
44	D33t1_170424_F11	draft	Isolate	SAMN15532403	stool	Icahn School of Medicine at Mount Sinai	2020-06-17	245	3.28739	2832	64			98.92	3.19
45	1001713B170221_170320_C4	draft	Isolate	SAMN15532972	stool	Icahn School of Medicine at Mount Sinai	2020-06-17	278	3.36042	2935	63.7			99.48	1.97
46	1001713B170221_170320_D6	draft	Isolate	SAMN15532513	stool	Icahn School of Medicine at Mount Sinai	2020-06-17	465	3.34542	3001	64.1			98.66	1.08
47	J1101653_170612_H2	draft	Isolate	SAMN15532412	stool	Icahn School of Medicine at Mount Sinai	2020-06-23	58	3.52046	2974	64.3			100	2.42
48	J1101653_170612_B5	draft	Isolate	SAMN15533018	stool	Icahn School of Medicine at Mount Sinai	2020-06-23	58	3.31941	2814	64			100	1.61
49	J1100102_180507_G10	draft	Isolate	SAMN15532728	stool	Icahn School of Medicine at Mount Sinai	2020-06-23	83	3.38719	2899	63.9			100	0.81
50	J1100102_180507_B8	draft	Isolate	SAMN15532427	stool	Icahn School of Medicine at Mount Sinai	2020-06-23	72	3.3461	2850	64			100	0
51	APC055-529_1D	complete	Isolate	SAMN23789010	fecal sample	APC microbiome Ireland, UCC, Ireland	this study	2	3.46****	2984****	64.06****
52	APC055-539_5C	complete	Isolate	SAMN23789061	fecal sample	APC microbiome Ireland, UCC, Ireland	this study	1	3.12	3039	64.07
53	APC055-910_1E	complete	Isolate	SAMN23789160	fecal sample	APC microbiome Ireland, UCC, Ireland	this study	1	3.38	2854	63.97
54	APC055-924_7B	complete	Isolate	SAMN23789262	fecal sample	APC microbiome Ireland, UCC, Ireland	this study	1	3.8	3244	62.46
55	APC055-928_H3_3	complete	Isolate	SAMN23789279	fecal sample	APC microbiome Ireland, UCC, Ireland	this study	1	3.27	2746	61.88
56	APC055-943_4	complete	Isolate	SAMN23789285	fecal sample	APC microbiome Ireland, UCC, Ireland	this study	1	3.07	2941	64.19
57	APC-F2_3	complete	Isolate	SAMN23789468	fecal sample	APC microbiome Ireland, UCC, Ireland	this study	3	3.25****	2742****	64.13****
	*MAG genomes obtained from Nayfach et al
	**CDS predicted by prodigal
	***analysis preformed using CheckM-lineage
	****chromosome only
																539_5C	910_1E	924_7B	928_H3_3	943_4	A2	AB12_2	AB8_2	AN51LG	BSD2780120874_150323_H10	BSD2780120875_150330_C12	Bg7063	C592	CC75	CC82_BH12	CC86	D33t1_170424_B8	D33t1_170424_F1	DSM11767	DSM11863	DSM15644	DSM2243	F2_3	FCC8	J1100102_180507_B8	J110102_180507_G10	J1101437_171009_A1	J1101653_170612_B5	J1101653_170612_H2	MGYG_HGUT_02544	MR1_12	MRI_F36	MRI_F37	MRI_F40
[truncated: 9 more columns]

## Sheet: Table S2
Table S2. Details for E.lenta isolates obtained in this study.
Isolate	Genome & plasmid assession number	short-reads (coverage)	long-reads (coverage)	Subject	Isolation source	Age	Sex	Race
APC055-529-1D	CP089331, CP089332	885.52	17.0177	APC055/529	Faeces	36	F	NA
APC055-539-5C	CP089333	1620.7	41.2891	APC055/539	Faeces	33	M	NA
APC055-920-1E	CP089334	1035.79	79.2814	APC055/920	Faeces
APC055-924-7B	CP089335	420.154	13.3877	APC055/924	Faeces	43	F	White_caucasian
APC055-928-H3-3	CP089336	2707.45	37.6112	APC055/928	Faeces
APC055-943-4	CP089337	719.028	10.7248	APC055/943	Faeces	25	M	NA
APC-F2-3	CP089338, CP089339, CP089340	516.466	16.0232	APC/F2-3	Faeces	NA	F	NA
DSM2243_R211	JAJQIW000000000	495.796		post 72 hours continous fermination with DSM2243	DSM2243 isolate post continous fermentation for 72 hours	NA	NA	NA
DSM2243_R611	JAJQIX000000000	302.889		post 72 hours continous fermination with DSM2245	DSM2243 isolate post continous fermentation for 72 hours	NA	NA	NA
DSM2243_R1011	JAJQKW000000000	431.966		post 72 hours continous fermination with DSM2246	DSM2243 isolate post continous fermentation for 72 hours	NA	NA	NA

## Sheet: Table S3
Table S3: Primers utilised for PCRs conducted in this study
Primer name	Target	Sequence (5' to 3')	Reference
1_1_60FAAphi6-R	1_1_60FAAphi6-attP	gcatatccggcaagcac	this study
1_1_60FAAphi6-F	1_1_60FAAphi6-attP	ggctcgttttcagtgcg	this study
14phi1-R	14phi1-attP	ggtgccgcgttttgtac	this study
14phi1-F	14phi1-attP	cggtgggcgatttcatg	this study
14phi7-R	14phi7-attP	ttgaggacatgggcgag	this study
14Aphi7-F	14phi7-attP	gagcagatcacgcttac	this study
DSM2243phi4-R	DSM2243phi4-attP	ggaggaggacccggaaa	this study
DSM2243phi4-F	DSM2243phi4-attP	caacgtctgaatgcggg	this study
Valenciaphi2-R	Valenciaphi2-attP	gcggcgtgttcctca	this study
Valenciaphi2-F	Valenciaphi2-attP	ctcatgggccgttccga	this study
LEN-F1	16S rRNA gene of E. lenta	catgaagtggcgaacgggtga	Kageyama et al
LEN-Rl	16S rRNA gene of E. lenta	cttctgctgcaggtaccgtcgaatt	Kageyama et al
Kageyama, A.; Benno, Y.; Nakase, T. Phylogenetic evidence for the transfer of Eubacterium lentum to the genus Eggerthella as Eggerthella lenta gen. nov., comb. nov. Int. J. Syst. Bacteriol. 1999, 49, 1725–1732.

## Sheet: Table S4
Table S4. Determined MIC values of cefotaxime and ceftriaxone against E. lenta (mean of three biological replicates)
Isolate	MIC, ug/mL
	cefotaxime	ceftriaxone
DSM2243	>156	>78
14A	>156	>156
1-1-60NA	>156	>313
11C	>156	>156
Valencia	>156	>2500
DSM11767	>39	>78
DSM11863	>156	>313

## Sheet: Table S5
Table S5. Morphology prediction of E. lenta prophages based on VirFam
Clade	Discription of clade	type example	packaging type
clade 1	Siphoviridae of Type1 (Cluster 1)	SPP1-like	SPP1 packages its DNA by a headful packaging mechanism
clade 2	Siphoviridae of Type1 (Cluster 1)	SPP1-like	SPP1 packages its DNA by a headful packaging mechanism
clade 3	Siphoviridae of Type1 (Cluster 1)	SPP1-like	SPP1 packages its DNA by a headful packaging mechanism
clade 4	Siphoviridae of Type1 (Cluster 1)	SPP1-like	SPP1 packages its DNA by a headful packaging mechanism
clade 5	Siphoviridae of Type1 (Cluster 1)	SPP1-like	SPP1 packages its DNA by a headful packaging mechanism
clade 6	Siphoviridae of Type1 (Cluster 1)	SPP1-like	SPP1 packages its DNA by a headful packaging mechanism
clade 7	Siphoviridae of Type1 (Cluster 2)	phi-105	105 packages its DNA by cohesive single-stranded ends
clade 8	Siphoviridae of Type1 (Cluster 10)	Bxb1-like	Bxb1 related to phiLC3 which packages DNA by cohesive single-stranded ends
clade 9	Siphoviridae of Type1 (Cluster 2)	phi-105	105 packages its DNA by cohesive single-stranded ends
clade 10	Siphoviridae of Type1 (Cluster 2)	phi-105	105 packages its DNA by cohesive single-stranded ends

## Sheet: Table S6
Table S6. Viral clusters of E.lenta prophages as defined by vconTACT2 analysis
Cluster	Size	Density	Internal weight	External weight	Quality	P-value	Members
1	4	270.7	1624	557.6	0.7417	0.0142148	1001302B_160321_A1phi9, 1_1_60FAAphi6, J1100102_180507_G10phi9, TF05-26B-4phi9
2	9	301.9	10900	992.2	0.915	0.000201916	1001095IJ_161003_H5phi1, 16Aphi1, AB8_2phi1, APC055-529-1Dphi1, BSD2780120875_150330_C12phi1, MGYG-HGUT-02544phi1, MRI_12phi1 ResAG49phi1
3	5	119.4	1194	1148	0.5076	0.0183569	32-6-1_6_NAphi2, DSM15644phi3, Valenciaphi2, DSM1544phi4, DSM2243phi4
4	2	371.7	371.7	643	0.3648	0.110336	DSM1544phi4,DSM2243phi4
7	10	364.4	16400	967.3	0.9432	3.1e-05	16Aphi7, 32-6-1_6_Naphi7, APC055-529-1Dphi7, APC055-920-1Ephi7, APC055-924-7Bphi7, J1100102_180507_G10phi7, MGYG-HGUT-02544phi7, MR1-37phi7, MRI-F36phi7 MRI-F40phi7,
6	4	263.8	1583	56.77	0.9607	0.0065619	CC82_BHI2phi5, C592phi5 J1101437_171009_A1phi5, J1101653_170612_H2phi5

## Sheet: Table_S7
Table S7. Presence of spacers among 42 E. lenta isolates target prophages and regions they target
	strain
SPACER_no	1001095IJ_161003_H5	1001136B_160425_H2	1001287H_170206_A6	1001311H_170123_F12	1001713B170221_170320_C4	1001713B170221_170320_D6	19C	28B	32-6-I-6-NA	529-1D_5	539-5C_3	910-1E_5	924-7B_1	928-H3-3_8	A2	AB8#2	Bg7063	BSD2780120874_150323_H10	BSD2780120875_150330_C12	C592	CC7/5D5	CC8/6D5	CC82-BH12	D33t1_170424_B8	D33t1_170424_F11	DSM11767	DSM15644	DSM2243	F2-3_10	J1100102_180507_B8	J1100102_180507_G10	J1101437_171009_A1	J1101653_170612_B5	J1101653_170612_H2	MR1#12	MRI-F36	MRI-F37	MRI-F40	ResAG-121	ResAG-145	ResAG-49	ResAG-88	Present in (of 42)	target	region-targeted
1	1	0	0	0	0	0	0	0	0	0	0	1	0	0	0	0	0	0	1	0	0	0	0	0	0	0	0	0	0	0	1	0	0	0	0	0	0	0	0	0	1	0	5	16Aphi1	hypothetical protein
2	1	0	0	0	0	0	0	0	0	0	0	1	0	0	0	0	0	0	1	0	0	0	0	0	0	0	0	0	0	0	1	0	0	0	0	0	0	0	0	0	1	0	5	16Aphi1	CMP N-glycosidase
3	0	0	0	0	0	0	0	0	0	0	0	0	0	0	0	1	0	0	0	1	0	0	0	0	0	0	0	0	0	0	0	1	0	0	0	1	1	0	0	0	0	0	5	1001095IJ_161003_H5phi1	H-lectin domain
4	0	0	0	0	0	0	0	0	0	0	0	0	0	0	0	1	0	0	0	1	0	0	0	0	0	0	0	0	0	0	0	1	0	0	0	1	1	0	0	0	0	0	5	1001095IJ_161003_H5phi1	hypothetical protein
5	0	1	0	0	0	0	0	0	0	0	0	0	0	0	0	0	0	0	0	0	0	0	0	0	0	0	0	0	0	0	0	0	0	0	0	0	0	0	0	0	0	0	1	1001095IJ_161003_H5phi1	gp22
6	0	1	0	0	0	0	1	0	0	0	0	0	0	1	0	0	0	1	0	0	0	1	0	0	0	1	0	0	0	0	0	0	1	0	0	0	0	0	0	0	0	0	7	1001095IJ_161003_H5phi1	hypothetical protein
7	0	0	1	0	0	0	0	0	0	0	1	0	1	0	0	0	0	0	0	0	0	0	0	0	0	0	0	0	0	1	0	0	0	0	1	0	0	0	0	0	0	0	5	DSM1544phi4	hypothetical protein
8	0	0	0	1	0	0	1	0	0	0	0	0	0	1	0	0	0	1	0	0	0	1	0	1	1	1	0	0	0	0	0	0	1	0	0	0	0	0	0	0	0	0	9	16Aphi1	non-coding region
9	0	0	0	2	0	0	1	0	0	0	0	0	0	1	0	0	0	1	0	0	0	1	0	1	1	1	0	0	0	0	0	0	1	0	0	0	0	0	0	0	0	0	10	1001095IJ_161003_H5phi1	H-lectin domain
10	0	0	0	0	1	0	0	0	0	0	0	0	0	0	0	0	0	0	0	0	0	0	0	0	0	0	0	0	0	0	0	0	0	0	0	0	0	0	0	0	0	0	1	AB8_2phi1	portal protein
11	0	0	0	0	0	1	0	0	0	1	0	0	0	0	1	0	0	0	0	0	1	0	1	0	0	0	0	0	0	0	0	0	0	0	0	0	0	0	0	0	0	0	5	1_1_60FAAphi6	integrase
12	0	0	0	0	0	1	0	0	0	1	0	0	0	0	1	0	0	0	0	0	1	0	1	0	0	0	0	0	0	0	0	0	0	0	0	0	0	0	0	0	0	0	5	1_1_60FAAphi6	hypothetical protein
13	0	0	0	0	0	0	1	0	0	0	0	0	0	1	0	0	0	1	0	0	0	1	0	0	0	1	0	0	0	0	0	0	1	0	0	0	0	0	0	0	0	0	6	1001302B_160321_A1phi9	portal protein
14	0	0	0	0	0	0	0	1	0	0	0	0	0	0	0	0	0	0	0	0	0	0	0	0	0	0	0	0	0	0	0	0	0	0	0	0	0	0	0	0	0	1	2	1001302B_160321_A1phi9	hypothetical protein
15	0	0	0	0	0	0	0	1	0	0	0	0	0	0	0	0	0	0	0	0	0	0	0	0	0	0	0	0	0	0	0	0	0	0	0	0	0	0	0	0	0	0	1	1001095IJ_161003_H5phi1	hypothetical protein
16	0	0	0	0	0	0	0	1	0	0	0	0	0	0	0	0	0	0	0	0	0	0	0	0	0	0	0	0	0	0	0	0	0	0	0	0	0	0	0	0	0	1	2	1001302B_160321_A1phi9	head-tail-adoption protein
17	0	0	0	0	0	0	0	1	0	0	0	0	0	0	0	0	0	0	0	0	0	0	0	0	0	0	0	0	0	0	0	0	0	0	0	0	0	0	0	0	0	1	2	1001302B_160321_A1phi9	portal protein		1
18	0	0	0	0	0	0	0	1	0	0	0	0	0	0	0	0	0	0	0	0	0	0	0	0	0	0	0	0	0	0	0	0	0	0	0	0	0	0	0	0	0	1	2	1001302B_160321_A1phi9	hypothetical protein
19	0	0	0	0	0	0	0	0	0	1	0	0	0	0	1	0	0	0	0	0	1	0	1	0	0	0	0	0	1	0	0	0	0	0	0	0	0	0	0	0	0	0	5	SECO-MT75m2phi8	hypothetical protein
20	0	0	0	0	0	0	0	0	0	1	0	0	0	0	1	0	0	0	0	0	1	0	1	0	0	0	0	0	1	0	0	0	0	0	0	0	0	0	0	0	0	0	5	SECO-MT75m2phi8	hypothetical protein
21	0	0	0	0	0	0	0	0	0	0	0	1	0	0	0	0	0	0	0	0	0	0	0	0	0	0	0	0	0	0	0	0	0	0	0	0	0	0	0	0	0	0	1	SECO-MT75m2phi8	virulence-associated protein E
22	0	0	0	0	0	0	0	0	0	0	0	0	0	0	0	1	0	0	0	0	0	0	0	0	0	0	0	0	0	0	0	0	0	0	0	0	0	0	0	0	0	0	1	1_1_60FAAphi6	recombinational DNA repair protein RecT
23	0	0	0	0	0	0	0	0	0	0	0	0	0	0	0	1	0	0	0	1	0	0	0	0	0	0	0	0	0	0	0	1	0	0	0	1	1	0	0	0	0	0	5	1001302B_160321_A1phi9	hypothetical protein
24	0	0	0	0	0	0	0	0	0	0	0	0	0	0	0	1	0	0	0	0	0	0	0	0	0	0	0	0	0	0	0	0	0	0	0	1	1	0	0	0	0	0	3	1001302B_160321_A1phi9	portal protein
25	0	0	0	0	0	0	0	0	0	0	0	0	0	0	0	0	0	0	0	0	0	0	1	0	0	0	0	0	0	0	0	0	0	0	0	0	0	0	0	0	0	0	1	MRI_12phi1	non-coding region
26	0	0	0	0	0	0	0	0	0	0	0	0	0	0	0	0	0	0	0	0	0	0	0	0	0	0	0	0	0	0	0	0	1	0	0	0	0	0	0	0	0	0	1	1001095IJ_161003_H5phi1	non-coding region
27	0	0	0	0	0	0	0	0	0	0	0	0	0	0	0	0	0	0	0	0	0	0	0	0	0	0	0	0	0	0	0	0	0	1	0	0	0	1	1	0	0	0	3	1001302B_160321_A1phi9	head-tail-adoption protein		1
28	0	0	0	0	0	0	0	0	0	0	0	0	0	0	0	0	0	0	0	0	0	0	0	0	0	0	0	0	0	0	0	0	0	1	0	0	0	1	0	0	0	0	2	1001095IJ_161003_H5phi1	hypothetical protein
29	0	0	0	0	0	0	0	0	0	0	0	0	0	0	0	0	0	0	0	0	0	0	0	0	0	0	0	0	0	0	0	0	0	1	0	0	0	1	1	0	0	0	3	1001302B_160321_A1phi9	hypothetical protein
30	0	0	0	0	0	0	0	0	0	0	0	0	0	0	0	0	0	0	0	0	0	0	0	0	0	0	0	0	0	0	0	0	0	1	0	0	0	1	1	0	0	0	3	1001302B_160321_A1phi9	hypothetical protein
31	0	0	0	0	0	0	0	0	0	0	0	0	0	0	0	0	0	0	0	0	0	0	0	0	0	0	0	0	0	0	0	0	0	1	0	0	0	1	1	0	0	0	3	1001302B_160321_A1phi9	hypothetical protein
32	0	0	0	0	0	0	0	0	0	0	0	0	0	0	0	0	0	0	0	0	0	0	0	0	0	0	0	0	0	0	0	0	0	1	0	0	0	1	1	0	0	0	3	1001302B_160321_A1phi9	major capsid protein		1
33	0	0	0	0	0	0	0	0	0	0	0	0	0	0	0	0	0	0	0	0	0	0	0	0	0	0	0	0	0	0	0	0	0	1	0	0	0	0	1	0	0	0	2	1001095IJ_161003_H5phi1	hypothetical protein		1
34	0	0	0	0	0	0	0	0	0	0	0	0	0	0	0	0	0	0	0	0	0	0	0	0	0	0	0	0	0	0	0	0	0	1	0	0	0	0	1	0	0	0	2	1001095IJ_161003_H5phi1	hypothetical protein
35	0	0	0	0	0	0	0	0	0	0	0	0	0	0	0	0	0	0	0	0	0	0	0	0	0	0	0	0	0	0	0	0	0	1	0	0	0	1	1	0	0	0	3	1001095IJ_161003_H5phi1	H-lectin domain
36	0	0	0	0	0	0	0	0	0	0	0	0	0	0	0	0	0	0	0	0	0	0	0	0	0	0	0	0	0	0	0	0	0	0	0	1	1	0	0	0	0	0	2	DSM1544phi4	portal protein		1
37	0	0	0	0	0	0	0	0	0	0	0	0	0	0	0	0	0	0	0	0	0	0	0	0	0	0	0	0	0	0	0	0	0	0	0	0	0	1	1	0	0	0	2	1001302B_160321_A1phi9	portal protein		1
38	0	0	0	0	0	0	0	0	0	0	0	0	0	0	0	0	0	0	0	0	0	0	0	0	0	0	0	0	0	0	0	0	0	0	0	0	0	1	0	0	0	0	1	DSM1544phi4	large terminase
39	0	0	0	0	0	0	0	0	0	0	0	0	0	0	0	0	0	0	0	0	0	0	0	0	0	0	0	0	0	0	0	0	0	0	0	0	0	1	0	0	0	0	1	DSM1544phi4	gp4-like (Bacillus phage IEBH)
40	0	0	0	0	0	0	0	0	0	0	0	0	0	0	0	0	0	0	0	0	0	0	0	0	0	0	0	0	0	0	0	0	0	0	0	0	0	0	0	1	0	0	1	1001302B_160321_A1phi9	portal protein
41	0	0	0	0	0	0	0	0	0	0	0	0	0	0	0	0	0	0	0	0	0	0	0	0	0	0	0	0	0	0	0	0	0	0	0	0	0	0	0	1	0	0	1	1001302B_160321_A1phi9	hypothetical protein
42	0	0	0	0	0	0	0	0	0	0	0	0	0	0	0	0	0	0	0	0	0	0	0	0	0	0	0	0	0	0	0	0	0	0	0	0	0	0	0	1	0	0	1	1001095IJ_161003_H5phi1	rus [Bacillus phage BCJA1c]
43	0	0	0	0	0	0	0	0	0	0	0	0	0	0	0	0	0	0	0	0	0	0	0	0	0	0	0	0	0	0	0	0	0	0	0	0	0	0	0	0	0	1	1	1001095IJ_161003_H5phi1	hypothetical protein
44	0	0	0	0	0	0	0	0	0	0	0	0	0	0	0	0	0	0	0	0	0	0	0	0	0	0	0	0	0	0	0	0	0	0	0	0	0	0	0	0	0	1	1	1001302B_160321_A1phi9	major capsid protein		1
45	0	0	0	0	0	0	0	0	0	0	0	0	0	0	0	0	0	0	0	0	0	0	0	0	0	0	0	0	0	0	0	0	0	0	0	0	0	0	0	0	0	1	1	1001302B_160321_A1phi9	hypothetical protein
46	0	0	0	0	0	0	0	0	0	0	0	0	0	0	0	0	0	0	0	0	0	0	0	0	0	0	0	0	0	0	0	0	0	0	0	0	0	0	0	0	0	1	1	1001095IJ_161003_H5phi1	hypothetical protein
